# Supplementary material
Source: PubMed Central journal article supplement (PMC8246799)

## Supplementary Materials

**Supplementary Table 1.** Characteristics of non-metastatic CRC cases in the CPS-II by post-diagnostic use of aspirin and other NSAIDs<sup>a</sup>

|                           | Aspirin         |                             |                           | Other NSAIDs    |                              |                            |
|---------------------------|-----------------|-----------------------------|---------------------------|-----------------|------------------------------|----------------------------|
|                           | None<br>No. (%) | 1-<15<br>pill/mo<br>No. (%) | ≥15<br>pill/mo<br>No. (%) | None<br>No. (%) | 1-<15<br>pills/mo<br>No. (%) | ≥15<br>pills/mo<br>No. (%) |
| Total No.                 | 1,048           | 138                         | 745                       | 1,489           | 222                          | 220                        |
| Age at diagnosis, y       |                 |                             |                           |                 |                              |                            |
| <65                       | 147 (14.0)      | 19 (13.8)                   | 54 (7.2)                  | 168 (11.3)      | 25 (11.3)                    | 27 (12.3)                  |
| 65-<70                    | 219 (20.9)      | 33 (23.9)                   | 150 (20.1)                | 286 (19.2)      | 61 (27.5)                    | 55 (25.0)                  |
| 70-<75                    | 268 (25.6)      | 39 (28.3)                   | 173 (23.2)                | 354 (23.8)      | 66 (29.7)                    | 60 (27.3)                  |
| 75-<80                    | 241 (23.0)      | 30 (21.7)                   | 215 (28.9)                | 391 (26.3)      | 46 (20.7)                    | 49 (22.3)                  |
| 80-<85                    | 121 (11.5)      | 12 (8.7)                    | 120 (16.1)                | 213 (14.3)      | 19 (8.6)                     | 21 (9.5)                   |
| ≥85                       | 52 (5.0)        | 5 (3.6)                     | 33 (4.4)                  | 77 (5.2)        | 5 (2.3)                      | 8 (3.6)                    |
| Sex                       |                 |                             |                           |                 |                              |                            |
| Female                    | 574 (54.8)      | 74 (53.6)                   | 280 (37.6)                | 699 (46.9)      | 119 (53.6)                   | 110 (50.0)                 |
| Male                      | 474 (45.2)      | 64 (46.4)                   | 465 (62.4)                | 790 (53.1)      | 103 (46.4)                   | 110 (50.0)                 |
| Race                      |                 |                             |                           |                 |                              |                            |
| White                     | 1,022 (97.5)    | 136 (98.6)                  | 733 (98.4)                | 1,456 (97.8)    | 220 (99.1)                   | 215 (97.7)                 |
| Black                     | 13 (1.2)        | 0 (0)                       | 4 (0.5)                   | 13 (0.9)        | 1 (0.5)                      | 3 (1.4)                    |
| Other/Unknown             | 13 (1.2)        | 2 (1.4)                     | 8 (1.1)                   | 20 (1.3)        | 1 (0.5)                      | 2 (0.9)                    |
| Education                 |                 |                             |                           |                 |                              |                            |
| <High school              | 56 (5.3)        | 7 (5.1)                     | 53 (7.1)                  | 94 (6.3)        | 10 (4.5)                     | 12 (5.5)                   |
| High school graduate      | 284 (27.1)      | 45 (32.6)                   | 178 (23.9)                | 408 (27.4)      | 50 (22.5)                    | 49 (22.3)                  |
| Some college              | 342 (32.6)      | 36 (26.1)                   | 207 (27.8)                | 444 (29.8)      | 69 (31.1)                    | 72 (32.7)                  |
| College graduate          | 360 (34.4)      | 50 (36.2)                   | 303 (40.7)                | 536 (36)        | 92 (41.4)                    | 85 (38.6)                  |
| Unknown                   | 6 (0.6)         | 0 (0)                       | 4 (0.5)                   | 7 (0.5)         | 1 (0.5)                      | 2 (0.9)                    |
| Stage                     |                 |                             |                           |                 |                              |                            |
| Local                     | 523 (49.9)      | 77 (55.8)                   | 401 (53.8)                | 770 (51.7)      | 116 (52.3)                   | 115 (52.3)                 |
| Regional                  | 525 (50.1)      | 61 (44.2)                   | 344 (46.2)                | 719 (48.3)      | 106 (47.7)                   | 105 (47.7)                 |
| BMI, (kg/m <sup>2</sup> ) |                 |                             |                           |                 |                              |                            |
| <18.5                     | 36 (3.4)        | 5 (3.6)                     | 15 (2)                    | 48 (3.2)        | 5 (2.3)                      | 3 (1.4)                    |
| 18.5-<25                  | 471 (44.9)      | 59 (42.8)                   | 338 (45.4)                | 663 (44.5)      | 111 (50.0)                   | 94 (42.7)                  |
| 25-<30                    | 375 (35.8)      | 57 (41.3)                   | 272 (36.5)                | 544 (36.5)      | 82 (36.9)                    | 78 (35.5)                  |
| ≥30                       | 160 (15.3)      | 16 (11.6)                   | 115 (15.4)                | 227 (15.2)      | 23 (10.4)                    | 41 (18.6)                  |
| Unknown                   | 6 (0.6)         | 1 (0.7)                     | 5 (0.7)                   | 7 (0.5)         | 1 (0.5)                      | 4 (1.8)                    |
| Smoking                   |                 |                             |                           |                 |                              |                            |
| Never                     | 462 (44.1)      | 56 (40.6)                   | 255 (34.2)                | 605 (40.6)      | 95 (42.8)                    | 73 (33.2)                  |
| Current                   | 39 (3.7)        | 6 (4.3)                     | 20 (2.7)                  | 46 (3.1)        | 10 (4.5)                     | 9 (4.1)                    |
| Former                    | 547 (52.2)      | 76 (55.1)                   | 470 (63.1)                | 838 (56.3)      | 117 (52.7)                   | 138 (62.7)                 |
| CVD                       | 196 (18.7)      | 24 (17.4)                   | 324 (43.5)                | 432 (29.0)      | 45 (20.3)                    | 67 (30.5)                  |
| Diabetes                  | 166 (15.8)      | 24 (17.4)                   | 148 (19.9)                | 269 (18.1)      | 25 (11.3)                    | 44 (20.0)                  |
| Hypertension              | 533 (50.9)      | 71 (51.4)                   | 451 (60.5)                | 800 (53.7)      | 115 (51.8)                   | 140 (63.6)                 |
| Cholesterol medication    |                 |                             |                           |                 |                              |                            |
| Never                     | 709 (67.7)      | 96 (69.6)                   | 331 (44.4)                | 895 (60.1)      | 126 (56.8)                   | 115 (52.3)                 |
| Former                    | 66 (6.3)        | 6 (4.3)                     | 44 (5.9)                  | 85 (5.7)        | 15 (6.8)                     | 16 (7.3)                   |
| Current                   | 273 (26.0)      | 36 (26.1)                   | 370 (49.7)                | 509 (34.2)      | 81 (36.5)                    | 89 (40.5)                  |

<sup>a</sup> Based on status at time of post-diagnosis questionnaire.

Abbreviations: BMI, body-mass-index; CPS-II, Cancer Prevention Study-II; CVD, cardiovascular disease; NSAIDs, non-steroidal anti-inflammatory drugs; mo, month

**Supplementary Table 2:** Selected characteristics of non-metastatic CRC cases in the CPS-II by total NSAIDs<sup>a</sup>

|                          | Pre-diagnosis   |                              |                            | Post-diagnosis  |                              |                           |
|--------------------------|-----------------|------------------------------|----------------------------|-----------------|------------------------------|---------------------------|
|                          | None<br>No. (%) | 1-<15<br>pills/mo<br>No. (%) | ≥15<br>pills/mo<br>No. (%) | None<br>No. (%) | 1-<15<br>pills/mo<br>No. (%) | ≥15<br>pill/mo<br>No. (%) |
| Total No.                | 1,051           | 304                          | 1,331                      | 835             | 221                          | 875                       |
| Age at Diagnosis, y      |                 |                              |                            |                 |                              |                           |
| <65                      | 142 (14)        | 61 (20)                      | 105 (8)                    | 117 (14)        | 29 (13)                      | 74 (9)                    |
| 65-<70                   | 211 (20)        | 64 (21)                      | 233 (18)                   | 163 (20)        | 56 (25)                      | 183 (21)                  |
| 70-<75                   | 263 (25)        | 74 (24)                      | 308 (23)                   | 202 (24)        | 70 (32)                      | 208 (24)                  |
| 75-<80                   | 232 (22)        | 61 (20)                      | 374 (28)                   | 200 (24)        | 43 (20)                      | 243 (28)                  |
| 80-<85                   | 134 (13)        | 33 (11)                      | 210 (16)                   | 107 (13)        | 16 (7)                       | 130 (15)                  |
| ≥85                      | 69 (7)          | 11 (4)                       | 101 (8)                    | 46 (6)          | 7 (3)                        | 37 (4)                    |
| Sex                      |                 |                              |                            |                 |                              |                           |
| Female                   | 515 (49)        | 153 (50)                     | 574 (43)                   | 445 (53)        | 131 (59)                     | 352 (40)                  |
| Male                     | 536 (51)        | 151 (50)                     | 757 (57)                   | 390 (47)        | 90 (41)                      | 523 (60)                  |
| Race                     |                 |                              |                            |                 |                              |                           |
| White                    | 1,023 (97)      | 295 (97)                     | 1,304 (98)                 | 813 (97)        | 217 (98)                     | 861 (98)                  |
| Black                    | 17 (2)          | 3 (1)                        | 11 (1)                     | 11 (1)          | 1 (1)                        | 5 (1)                     |
| Other/Unknown            | 11 (1)          | 6 (2)                        | 16 (1)                     | 11 (1)          | 3 (1)                        | 9 (1)                     |
| Education                |                 |                              |                            |                 |                              |                           |
| <High school             | 69 (6)          | 26 (9)                       | 76 (6)                     | 46 (6)          | 10 (5)                       | 60 (7)                    |
| High school graduate     | 309 (29)        | 79 (26)                      | 339 (26)                   | 235 (28)        | 69 (31)                      | 203 (23)                  |
| Some college             | 323 (31)        | 101 (33)                     | 392 (30)                   | 269 (32)        | 61 (28)                      | 255 (29)                  |
| College graduate         | 344 (33)        | 97 (32)                      | 519 (39)                   | 280 (34)        | 81 (37)                      | 352 (40)                  |
| Unknown                  | 6 (1)           | 1 (1)                        | 5 (1)                      | 5 (1)           | 0 (0)                        | 5 (1)                     |
| Stage                    |                 |                              |                            |                 |                              |                           |
| Local                    | 512 (49)        | 143 (47)                     | 692 (52)                   | 413 (49)        | 120 (54)                     | 468 (53)                  |
| Regional                 | 539 (51)        | 161 (53)                     | 639 (48)                   | 422 (51)        | 101 (46)                     | 407 (47)                  |
| BMI (kg/m <sup>2</sup> ) |                 |                              |                            |                 |                              |                           |
| <18.5                    | 22 (2)          | 3 (1)                        | 21 (2)                     | 30 (3.6)        | 8 (4)                        | 18 (2)                    |
| 18.5-<25                 | 441 (42)        | 125 (41)                     | 503 (38)                   | 375 (44.9)      | 102 (46)                     | 391 (45)                  |
| 25-<30                   | 394 (38)        | 115 (38)                     | 550 (41)                   | 299 (35.8)      | 83 (38)                      | 322 (37)                  |
| ≥30                      | 181 (17)        | 59 (19)                      | 248 (19)                   | 127 (15.2)      | 27 (12)                      | 137 (16)                  |
| Unknown                  | 13 (1)          | 2 (<1)                       | 9 (1)                      | 4 (0<1)         | 1 (0<1)                      | 7 (0<1)                   |
| Smoking                  |                 |                              |                            |                 |                              |                           |
| Never                    | 469 (45)        | 131 (43)                     | 475 (36)                   | 374 (45)        | 97 (44)                      | 302 (35)                  |
| Current                  | 67 (6)          | 18 (6)                       | 53 (4)                     | 28 (3)          | 13 (6)                       | 24 (3)                    |
| Former                   | 510 (48)        | 153 (50)                     | 801 (60)                   | 433 (52)        | 111 (50)                     | 549 (63)                  |
| Unknown                  | 5 (<1)          | 2 (<1)                       | 2 (<1)                     | 0 (0)           | 0 (0)                        | 0 (0)                     |
| CVD                      | 156 (15)        | 28 (9)                       | 446 (34)                   | 160 (19)        | 32 (15)                      | 352 (40)                  |
| Diabetes                 | 135 (13)        | 28 (9)                       | 251 (19)                   | 140 (17)        | 29 (13)                      | 169 (19)                  |
| Hypertension             | 459 (44)        | 130 (43)                     | 771 (58)                   | 420 (50)        | 99 (45)                      | 536 (61)                  |
| Cholesterol medication   |                 |                              |                            |                 |                              |                           |
| Never                    | 797 (76)        | 232 (76)                     | 742 (56)                   | 574 (69)        | 150 (68)                     | 412 (47)                  |
| Former                   | 48 (5)          | 7 (2)                        | 69 (5)                     | 50 (6)          | 13 (6)                       | 53 (6)                    |
| Current                  | 206 (20)        | 65 (21)                      | 520 (39)                   | 211 (25)        | 58 (26)                      | 410 (47)                  |

<sup>a</sup> Based on status at time of pre-diagnosis questionnaire.  
Abbreviations: BMI, body-mass-index; CPS-II, Cancer Prevention Study-II; CVD, cardiovascular disease; NSAIDs, non-steroidal anti-inflammatory drugs; mo, month

**Supplementary Table 3: CRC-specific mortality among non-metastatic cases by pre- and post-diagnostic total NSAIDs use**

|                                                                                                                                                                                                                                     | Total NSAIDs            |                                        |
|-------------------------------------------------------------------------------------------------------------------------------------------------------------------------------------------------------------------------------------|-------------------------|----------------------------------------|
|                                                                                                                                                                                                                                     | Deaths per person-years | Multivariable HR (95% CI) <sup>a</sup> |
| Pre-diagnosis                                                                                                                                                                                                                       |                         |                                        |
| Use on pre-diagnosis questionnaire                                                                                                                                                                                                  |                         |                                        |
| No use                                                                                                                                                                                                                              | 212 / 10,424            | 1.00 (ref)                             |
| 1-<15 pills/month (less than regular use)                                                                                                                                                                                           | 60 / 3,241              | 0.97 (0.72-1.31)                       |
| ≥15 pills/month (regular use)                                                                                                                                                                                                       | 240 / 11,690            | 0.87 (0.71-1.06)                       |
| Use on pre-diagnosis questionnaire and preceding questionnaire                                                                                                                                                                      |                         |                                        |
| No use at pre-diagnosis questionnaire and no use at preceding questionnaire                                                                                                                                                         | 171 / 8,607             | 1.00 (ref)                             |
| Regular use at pre-diagnosis questionnaire, but not at preceding questionnaire                                                                                                                                                      | 40 / 1,903              | 0.85 (0.59-1.22)                       |
| Regular use at pre-diagnosis questionnaire and at preceding questionnaire                                                                                                                                                           | 106 / 5,218             | 0.75 (0.57-1.00)                       |
| Regular use at pre-diagnosis questionnaire, no data from preceding questionnaire                                                                                                                                                    | 94 / 4,569              | 1.02 (0.79-1.33)                       |
| Less than regular use on pre-diagnosis questionnaire and other less common patterns of use                                                                                                                                          | 101 / 5,058             | 1.01 (0.78-1.31)                       |
| Post-diagnosis <sup>b</sup>                                                                                                                                                                                                         |                         |                                        |
| Use on post-diagnosis questionnaire                                                                                                                                                                                                 |                         |                                        |
| None                                                                                                                                                                                                                                | 113 / 7,146             | 1.00 (ref)                             |
| 1-<15 pills/month (less than regular use)                                                                                                                                                                                           | 25 / 2,049              | 0.90 (0.58-1.41)                       |
| ≥15 pills/month (regular use)                                                                                                                                                                                                       | 113 / 7,039             | 0.90 (0.68-1.19)                       |
| Use on post-diagnosis questionnaire and pre-diagnosis questionnaire                                                                                                                                                                 |                         |                                        |
| No use at post-diagnosis questionnaire and no use at pre-diagnosis questionnaire                                                                                                                                                    | 64 / 4,709              | 1.00 (ref)                             |
| Regular use at post-diagnosis questionnaire, but not at pre-diagnosis questionnaire                                                                                                                                                 | 21 / 1,899              | 0.69 (0.42-1.15)                       |
| Regular use at post-diagnosis questionnaire and at pre-diagnosis questionnaire                                                                                                                                                      | 92 / 5,140              | 1.06 (0.75-1.49)                       |
| Less than regular use on post-diagnosis questionnaire and other less common patterns of use                                                                                                                                         | 74 / 4,487              | 1.08 (0.77-1.53)                       |
| <sup>a</sup> adjusted for age at diagnosis, diagnosis year category, sex, education, stage, BMI, smoking and history of cardiovascular disease                                                                                      |                         |                                        |
| <sup>b</sup> Post-diagnosis duration models do not include the "Regular use at post-diagnosis questionnaire, no data from pre-diagnosis questionnaire" category because inclusion in the analysis required known pre-diagnosis use. |                         |                                        |
| Abbreviations: HR, hazard ratio; CI, confidence interval                                                                                                                                                                            |                         |                                        |

**Supplementary Figure 1: Forest plots depicting potential effect modifiers of the association between total NSAIDs use pre- and post-diagnosis and CRC-specific mortality**

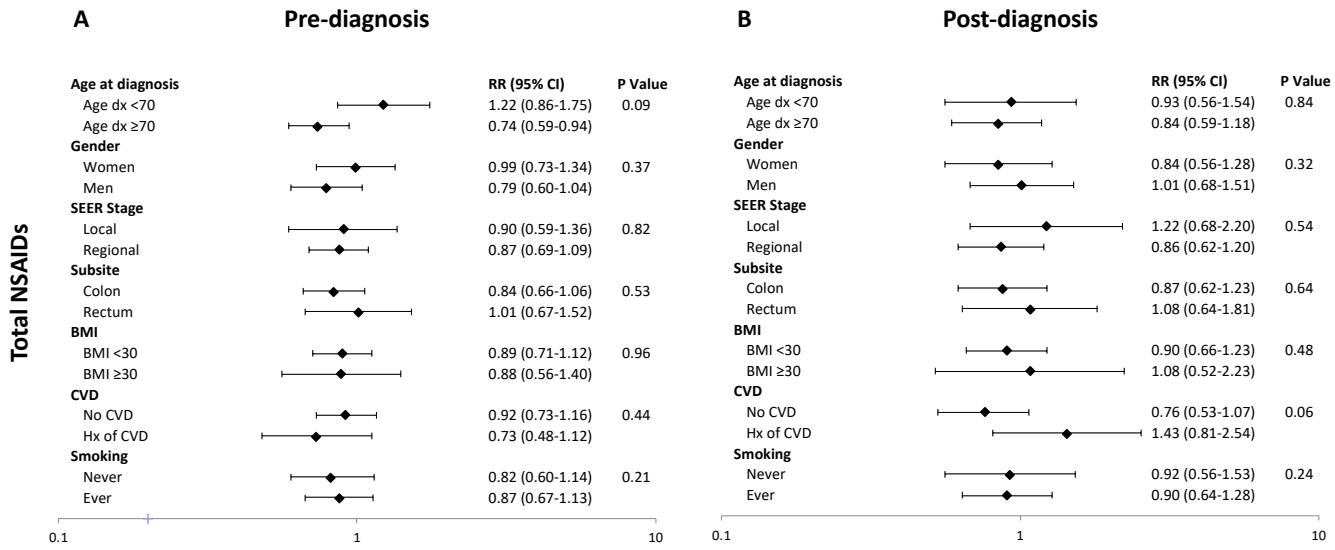

Supplement: djab008_supplementary_data.pdf [file djab008_supplementary_data.pdf]
